# Supplementary material for: Effects of oligosaccharides on the markers of glycemic control: a systematic review and meta-analysis of randomized controlled trials
Source: Royal Society of Chemistry journal article supplement (doi:10.1039/d1fo03204f), 2022-01-01
Supplement: d1fo03204f5.pdf [file d1fo03204f5.pdf]

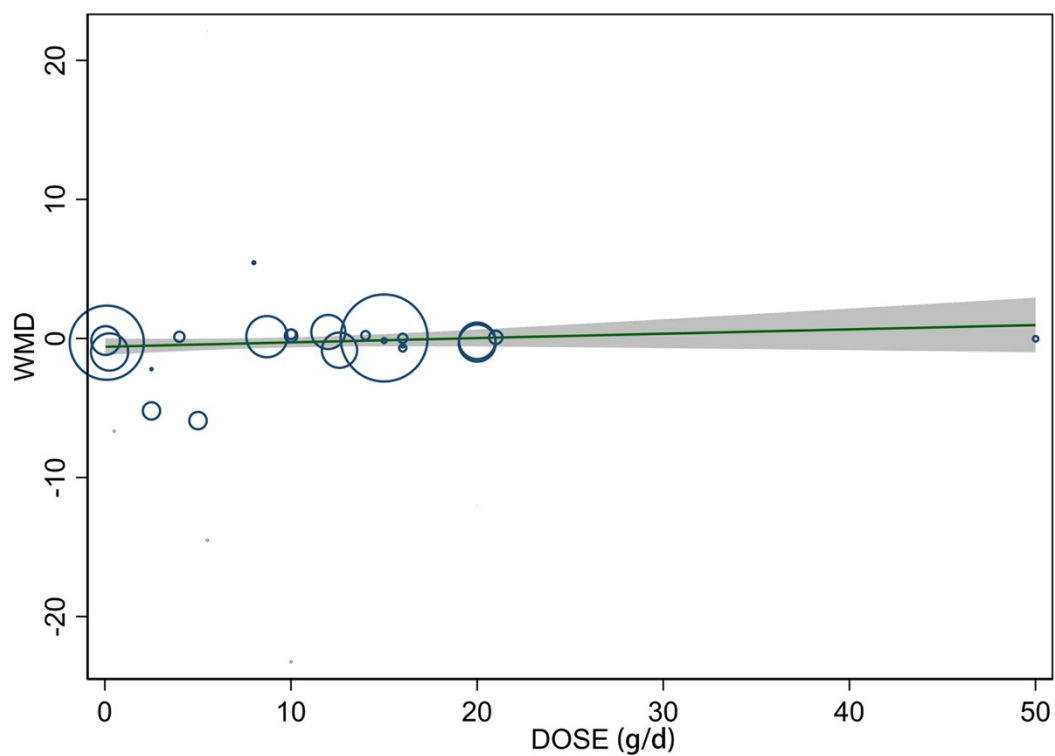

**Supplemental Figure 13** The results regression analysis of fasting blood insulin effect and intervention dose.
