# Supplementary figures and images for: Effects of oligosaccharides on the markers of glycemic control: a systematic review and meta-analysis of randomized controlled trials
Source: Royal Society of Chemistry journal article supplement (doi:10.1039/d1fo03204f), 2022-01-01

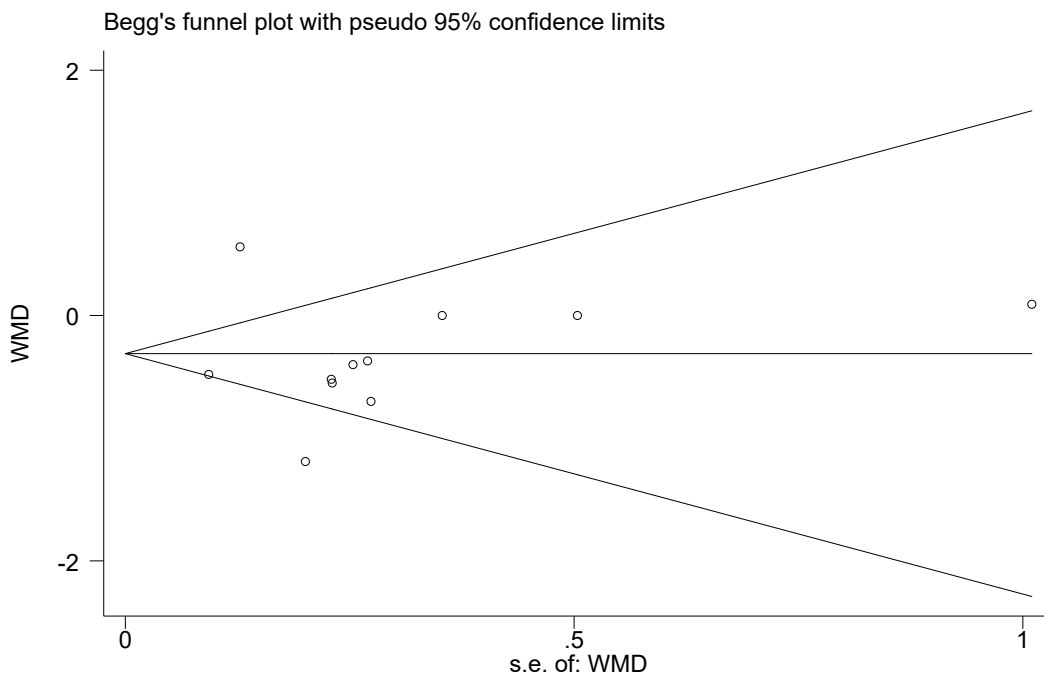

**Supplemental Figure 18** The results of Begg's test of  $HbA_{1c}$ .

Supplement: d1fo03204f10.pdf [file d1fo03204f10.pdf]

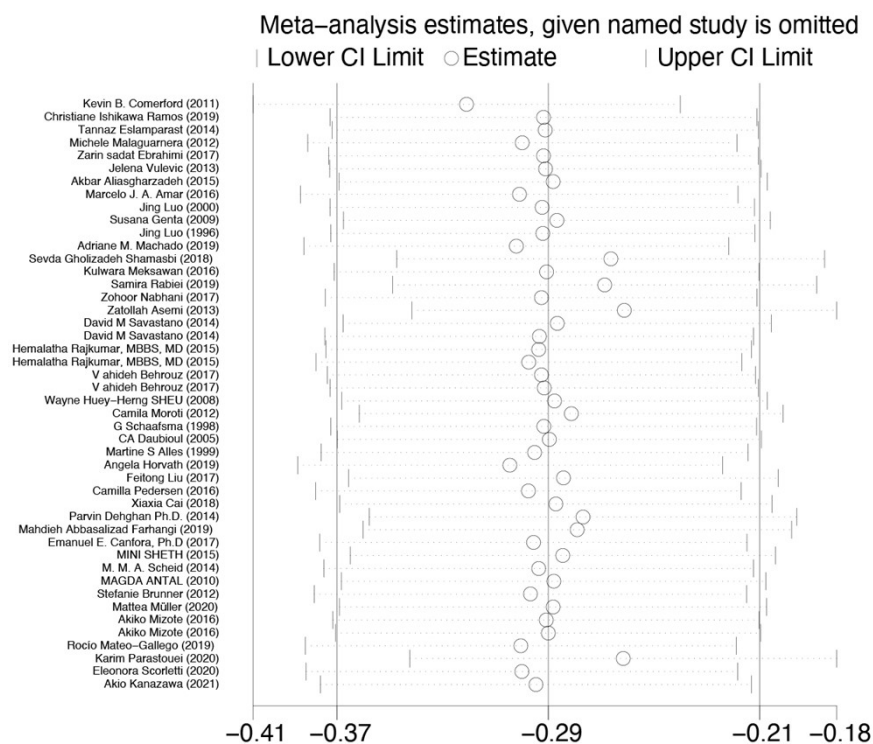

**Supplemental figure 2** The results of sensitive analysis of fasting blood glucose.

Supplement: d1fo03204f12.pdf [file d1fo03204f12.pdf]

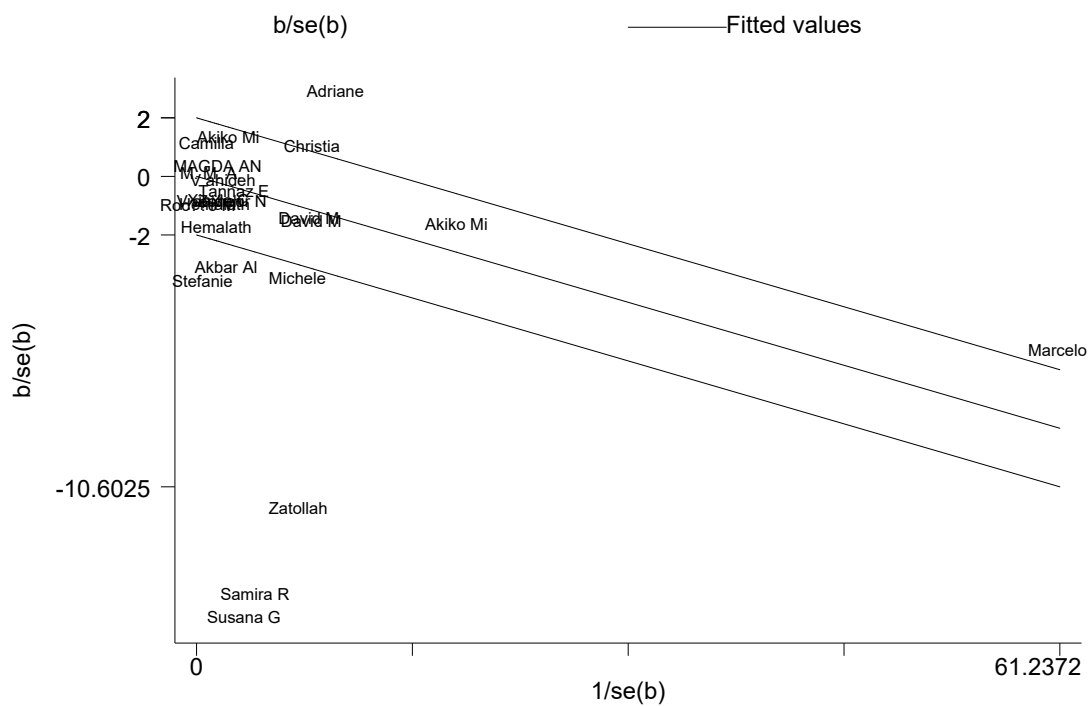

Supplemental Figure 21 The Gablbraith plot of HOMA-IR.

Supplement: d1fo03204f14.pdf [file d1fo03204f14.pdf]

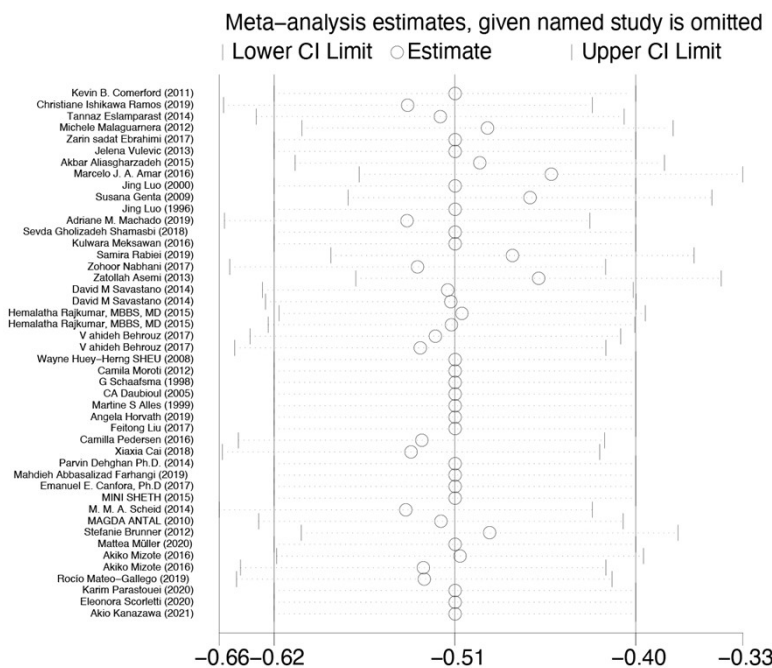

**Supplemental Figure 22** The results of sensitive analysis of HOMA-IR.

Supplement: d1fo03204f15.pdf [file d1fo03204f15.pdf]

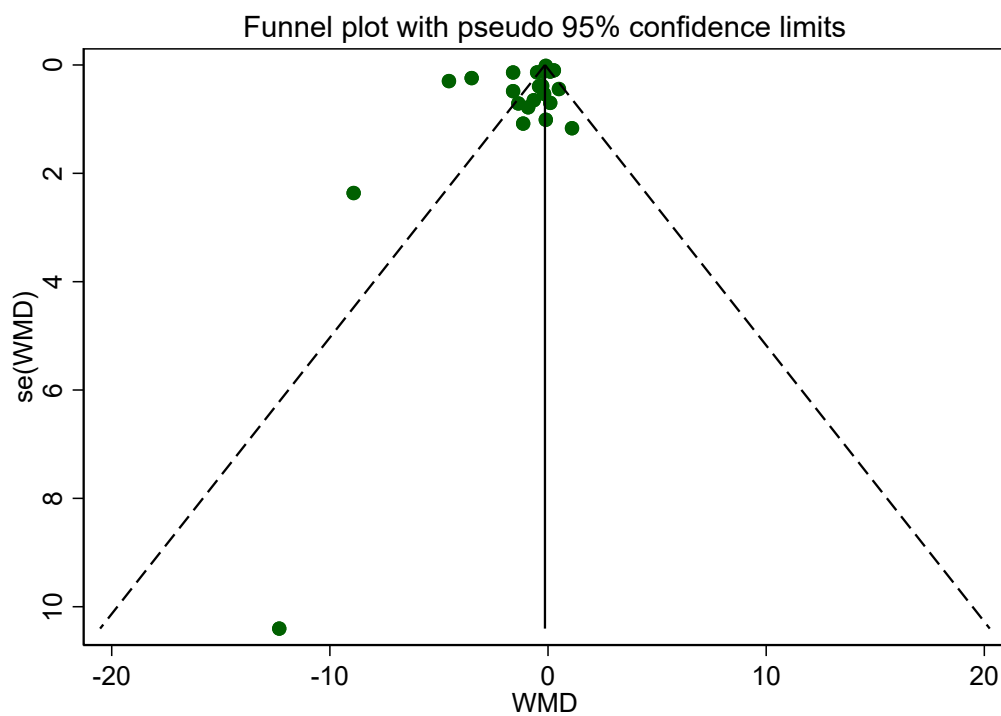

**Supplemental Figure 23** The funnel plot of HOMA-IR.

Supplement: d1fo03204f16.pdf [file d1fo03204f16.pdf]

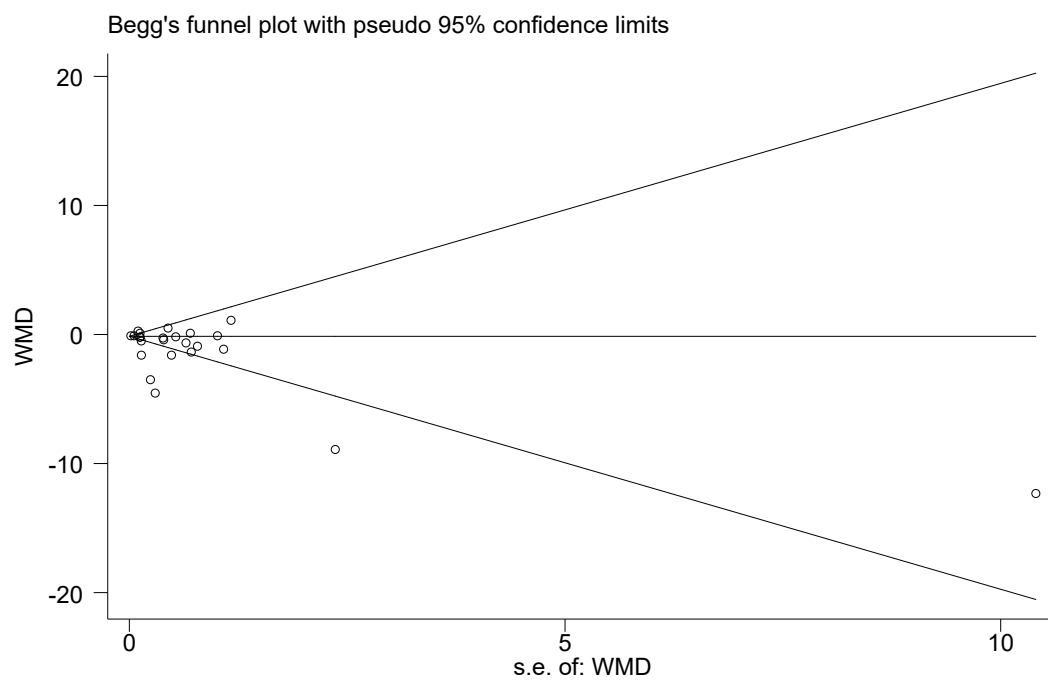

**Supplemental Figure 24** The results of Begg's test of HOMA-IR.

Supplement: d1fo03204f17.pdf [file d1fo03204f17.pdf]

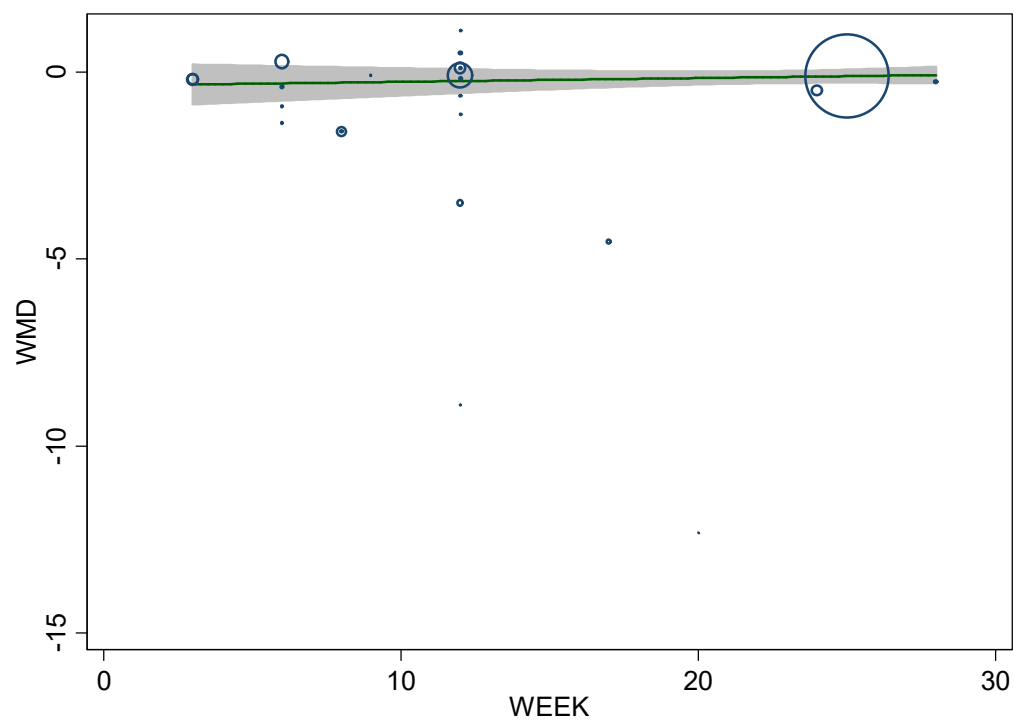

**Supplemental Figure 25** The results regression analysis of HOMA-IR effect and intervention time.

Supplement: d1fo03204f18.pdf [file d1fo03204f18.pdf]

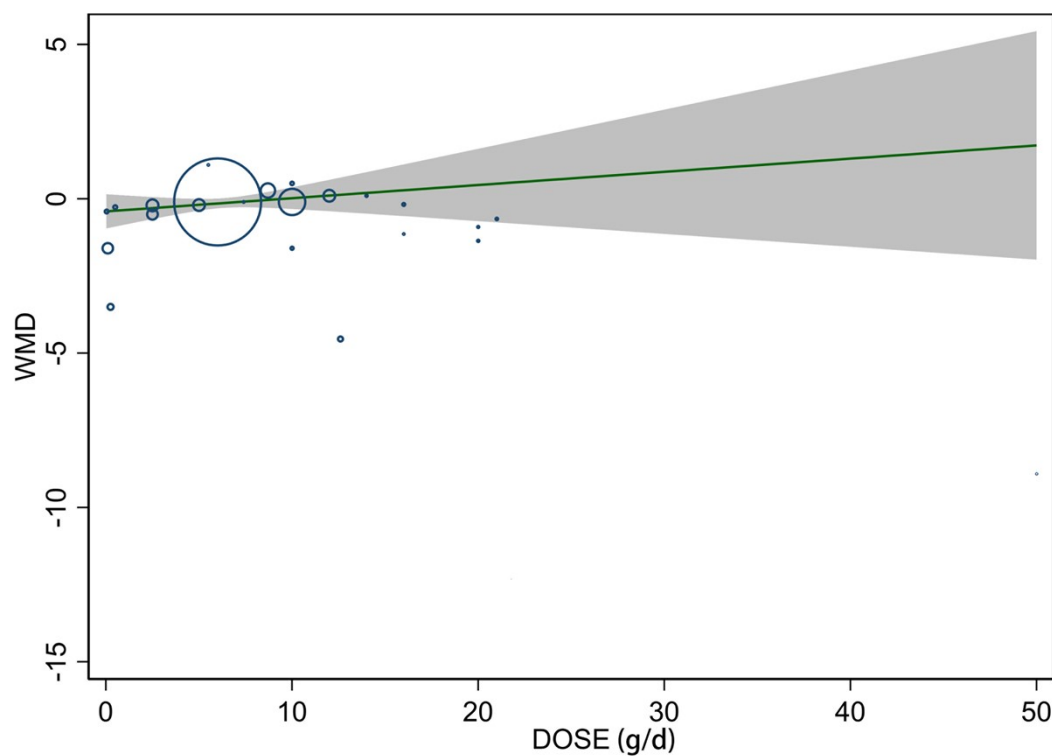

**Supplemental Figure 26** The results regression analysis of HOMA-IR effect and intervention dose.

Supplement: d1fo03204f19.pdf [file d1fo03204f19.pdf]

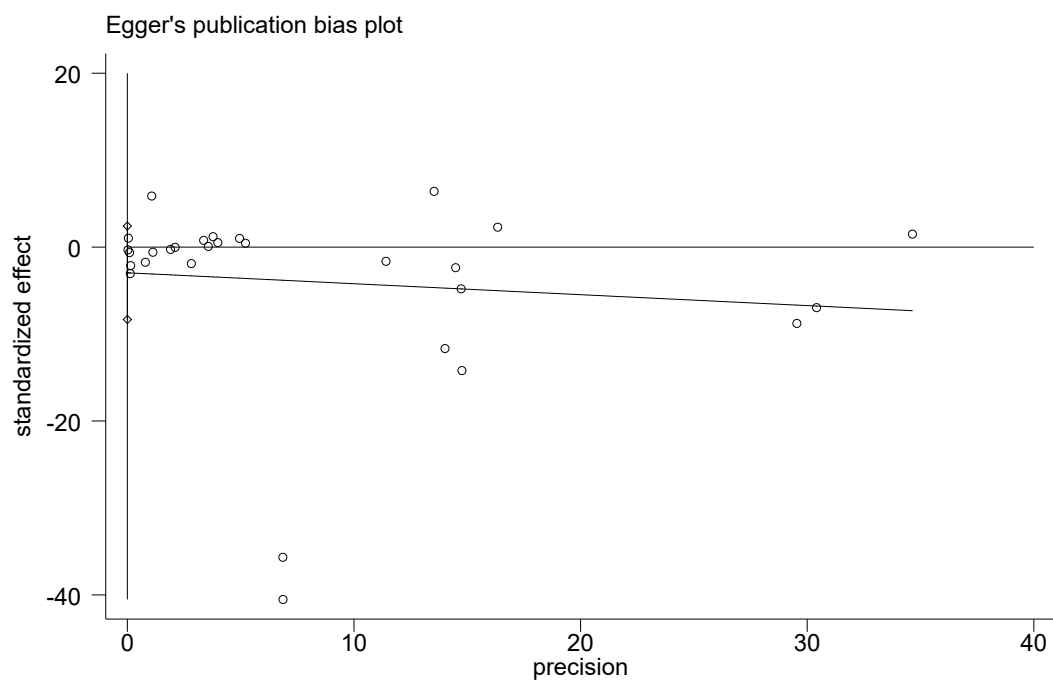

**Supplemental Figure 10** The results of Egger's test of fasting blood insulin.

Supplement: d1fo03204f2.pdf [file d1fo03204f2.pdf]

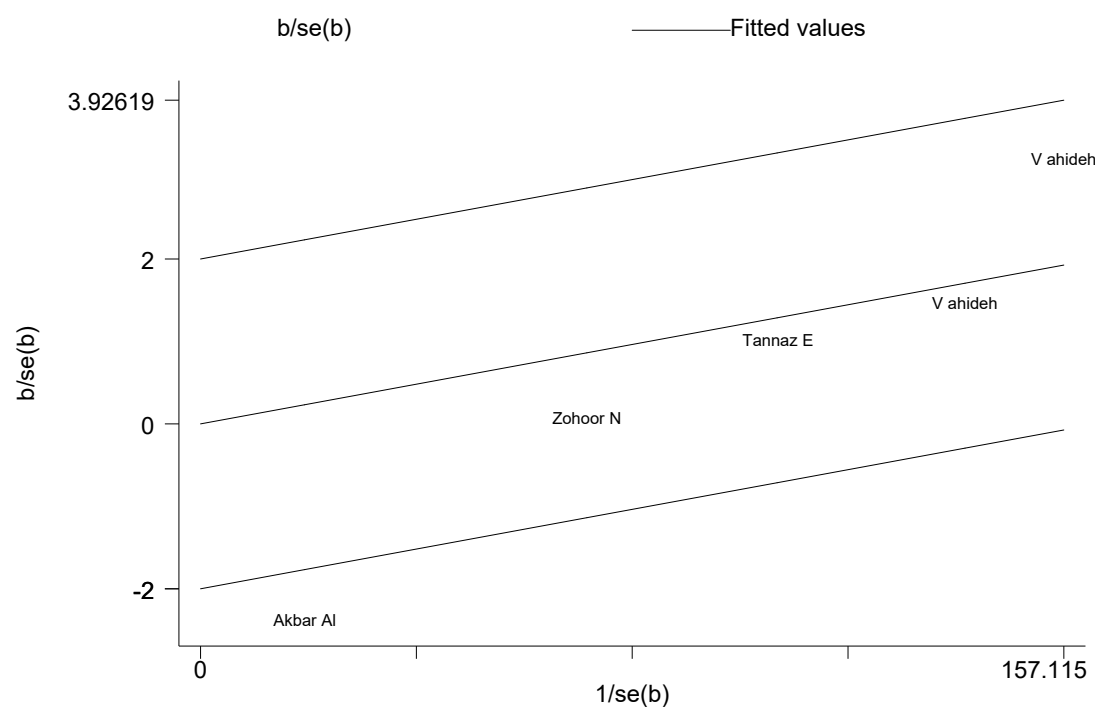

**Supplemental Figure 27** The Gablbraith plot of QUICKI.

Supplement: d1fo03204f20.pdf [file d1fo03204f20.pdf]

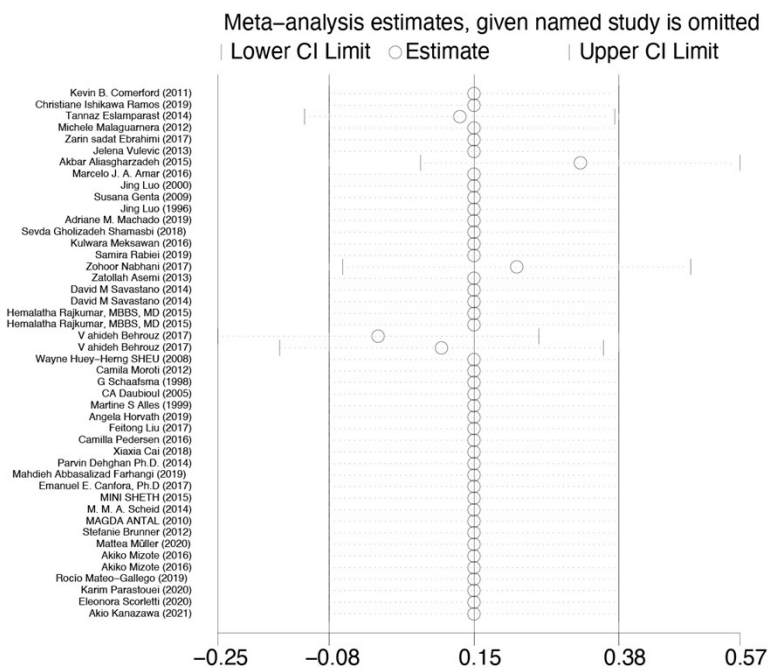

**Supplemental Figure 28** The results of sensitive analysis of QUICKI.

Supplement: d1fo03204f21.pdf [file d1fo03204f21.pdf]

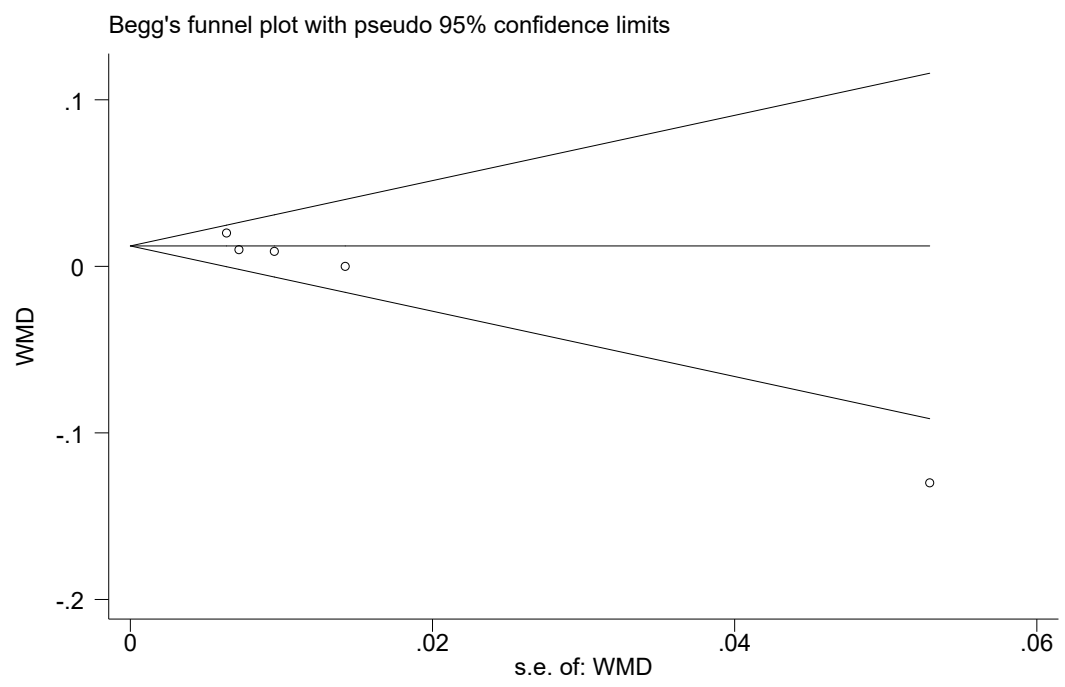

**Supplemental Figure 29** The results of Begg's test of QUICKI.

Supplement: d1fo03204f22.pdf [file d1fo03204f22.pdf]

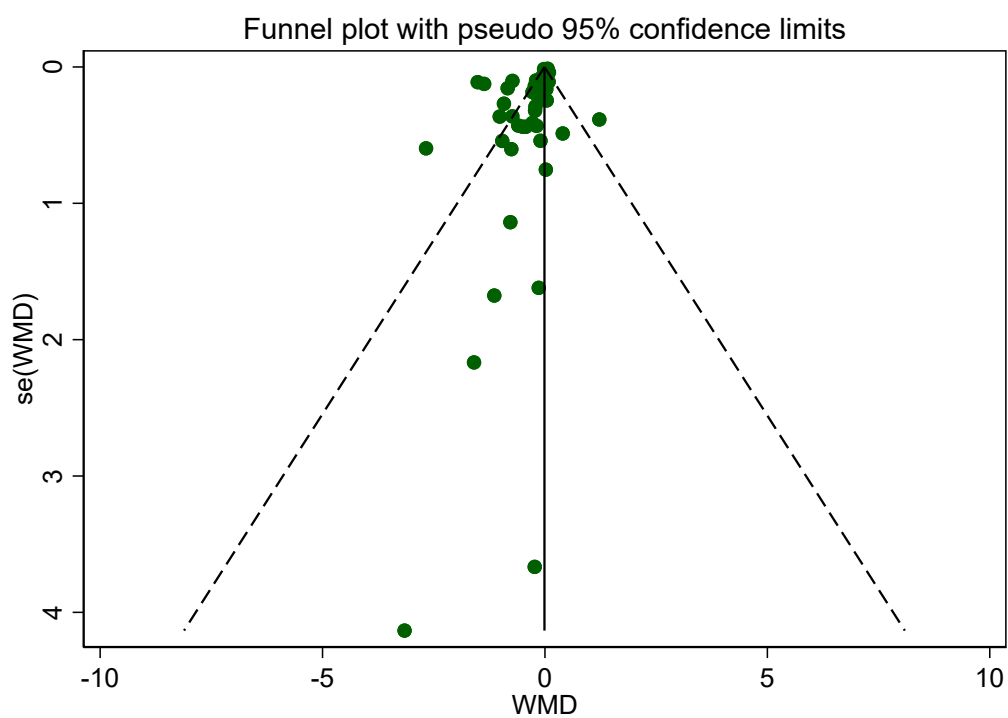

**Supplemental figure 3** The funnel plot of fasting blood glucose.

Supplement: d1fo03204f23.pdf [file d1fo03204f23.pdf]

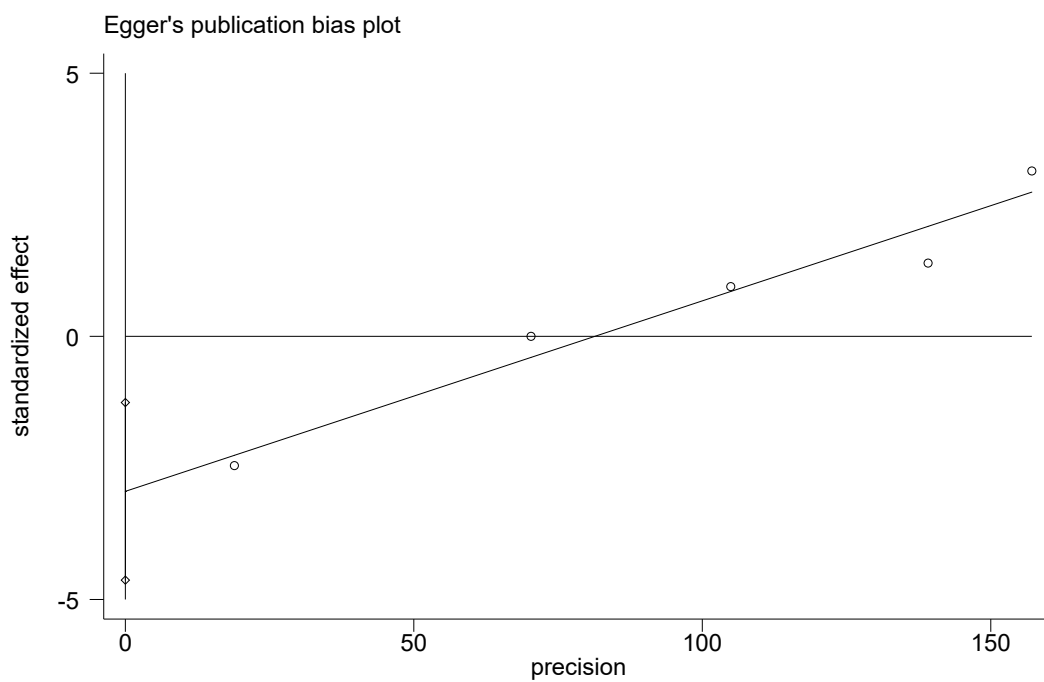

**Supplemental Figure 30** The results of Egger's test of QUICKI.

Supplement: d1fo03204f24.pdf [file d1fo03204f24.pdf]

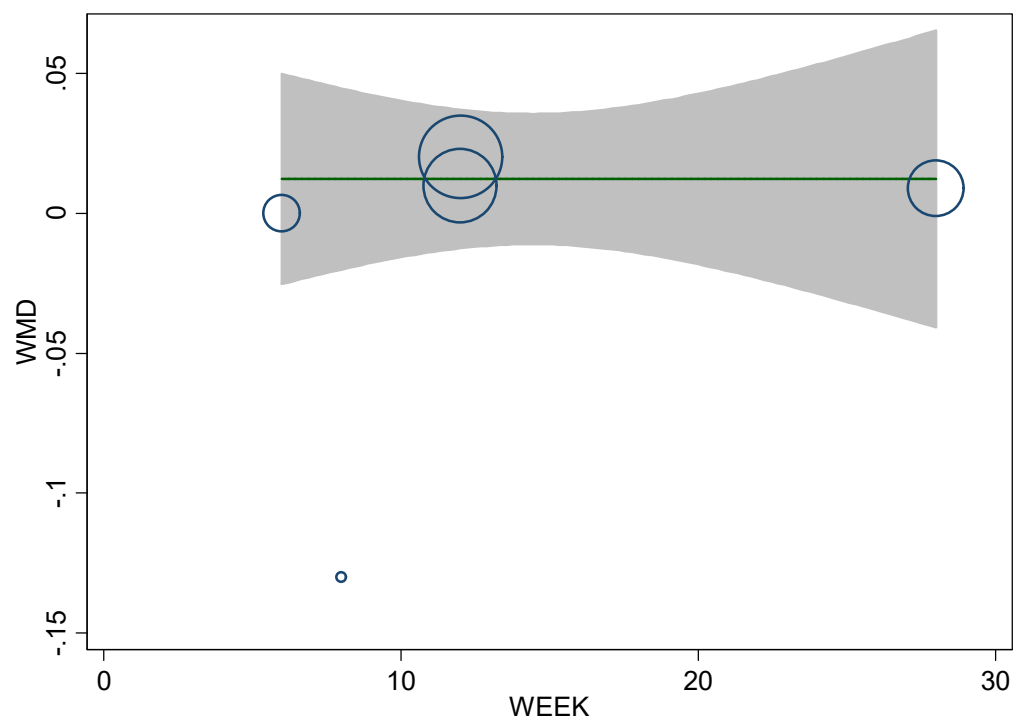

**Supplemental Figure 31** The results regression analysis of QUICKI effect and intervention time.

Supplement: d1fo03204f25.pdf [file d1fo03204f25.pdf]

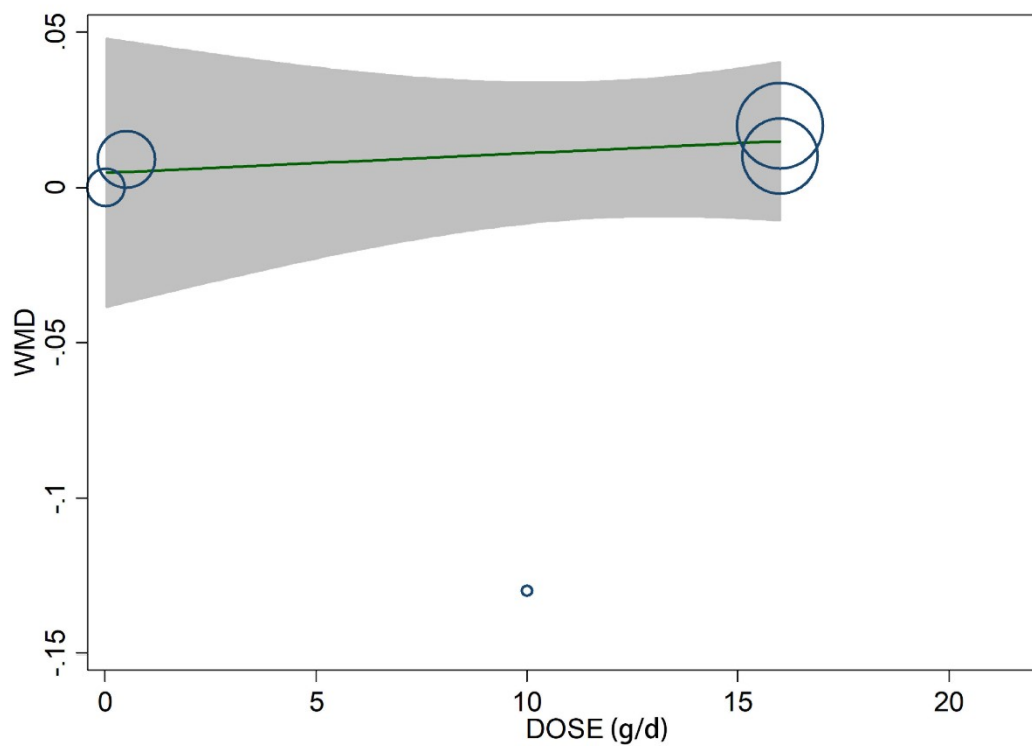

**Supplemental Figure 32** The results regression analysis of QUICKI effect and intervention dose.

Supplement: d1fo03204f26.pdf [file d1fo03204f26.pdf]

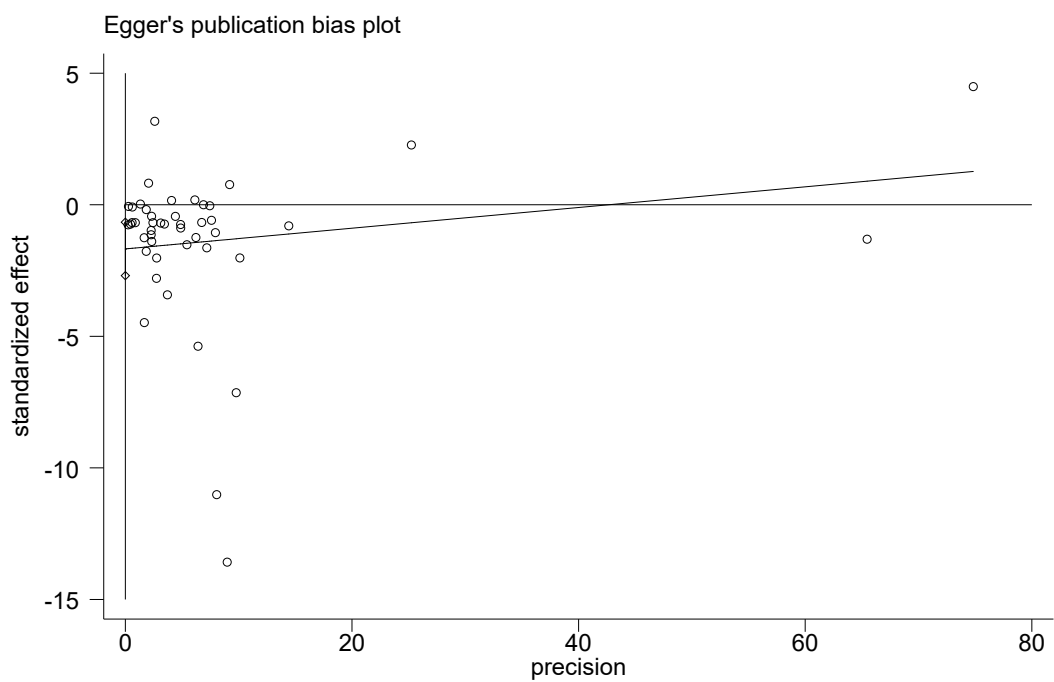

**Supplemental figure 4** The results of Egger's test of fasting blood glucose.

Supplement: d1fo03204f27.pdf [file d1fo03204f27.pdf]

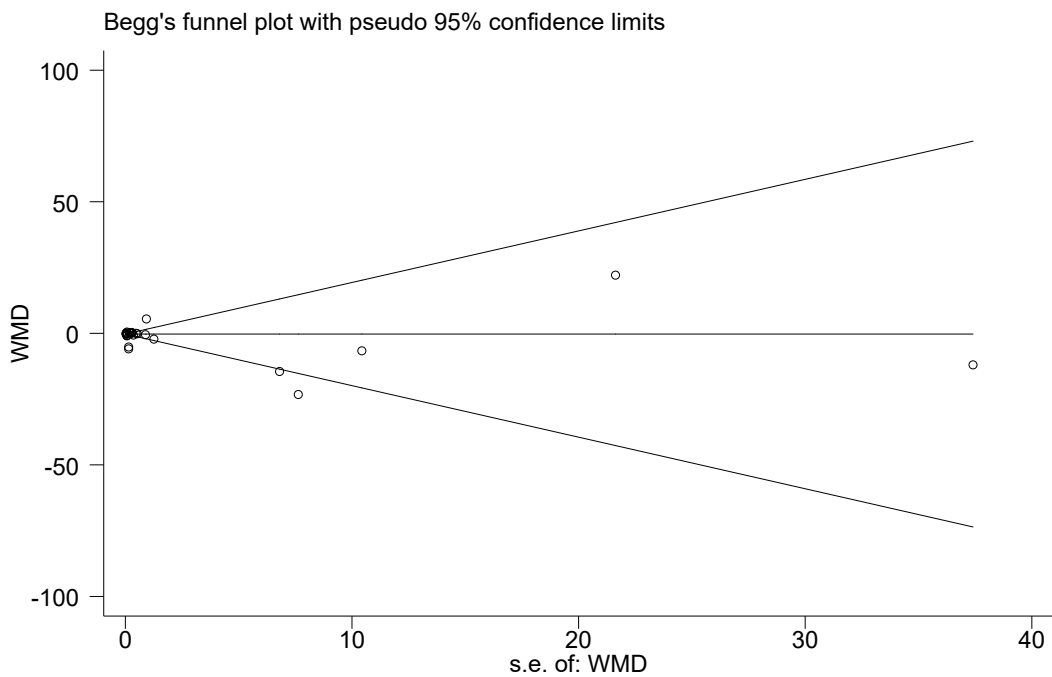

**Supplemental Figure 11** The results of Begg's test of fasting blood insulin.

Supplement: d1fo03204f3.pdf [file d1fo03204f3.pdf]

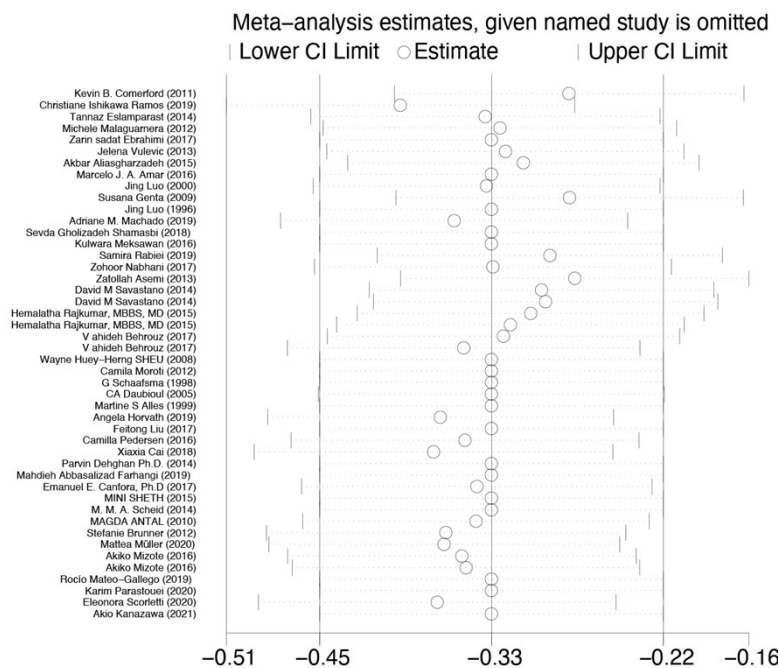

**Supplemental figure 8** The results of sensitive analysis of fasting blood insulin.

Supplement: d1fo03204f31.pdf [file d1fo03204f31.pdf]

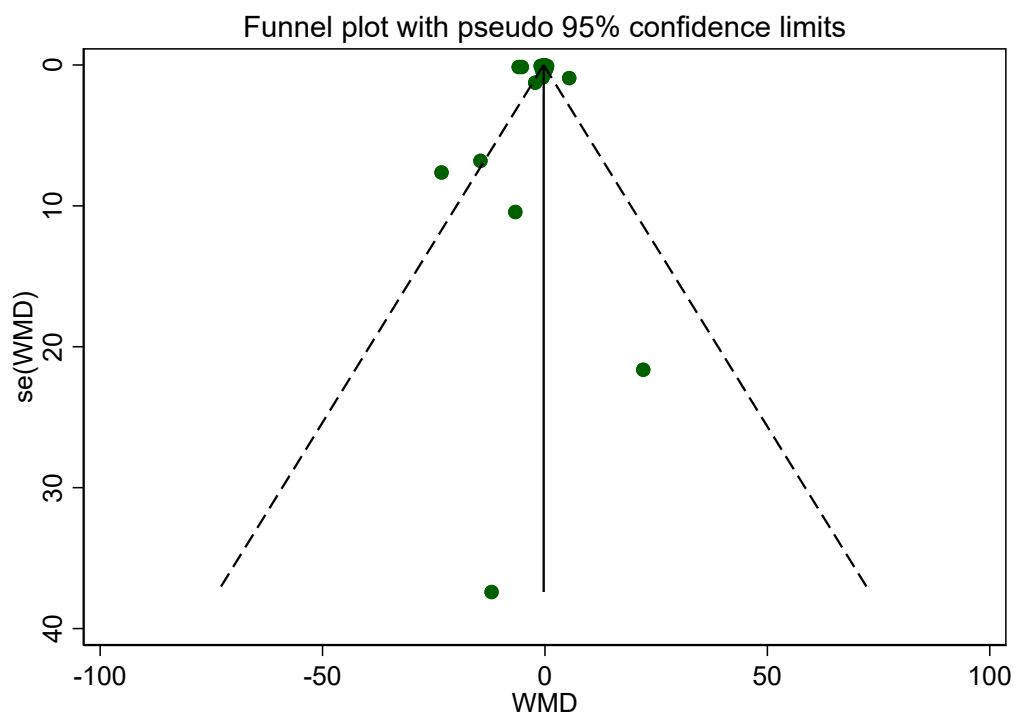

**Supplemental Figure 9** The funnel plot of fasting blood insulin.

Supplement: d1fo03204f32.pdf [file d1fo03204f32.pdf]

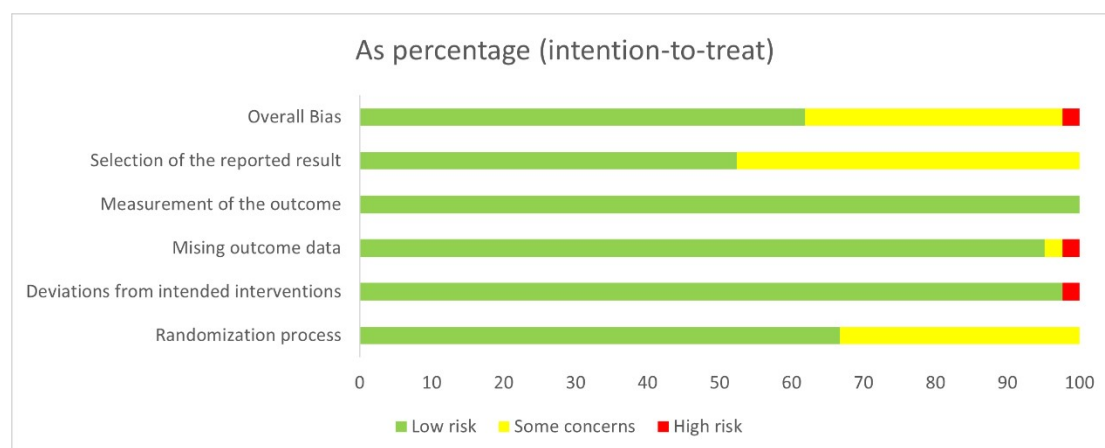

**Supplemental Figure 33.** Summary of the risk of bias.

Supplement: d1fo03204f33.pdf [file d1fo03204f33.pdf]

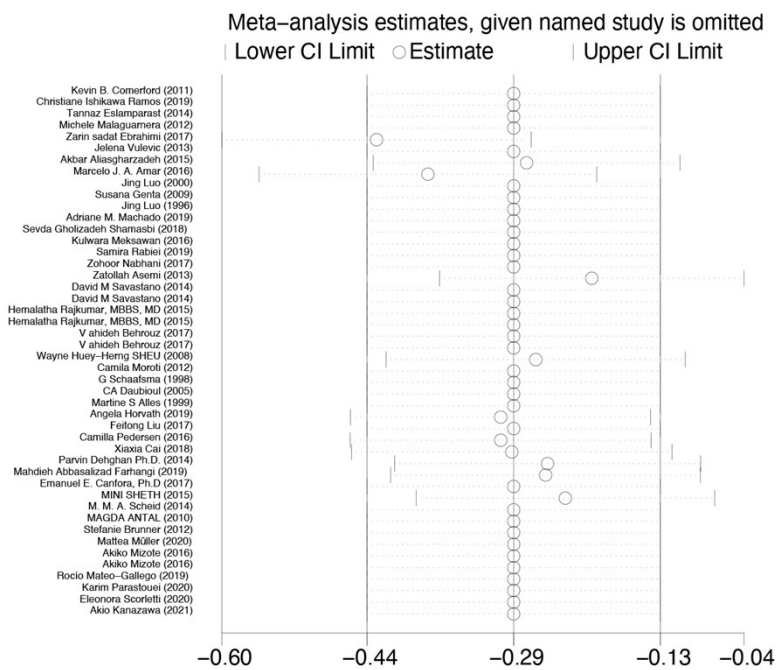

**Supplemental Figure 15** The results of sensitive analysis of HbA<sub>1c</sub>.

Supplement: d1fo03204f7.pdf [file d1fo03204f7.pdf]

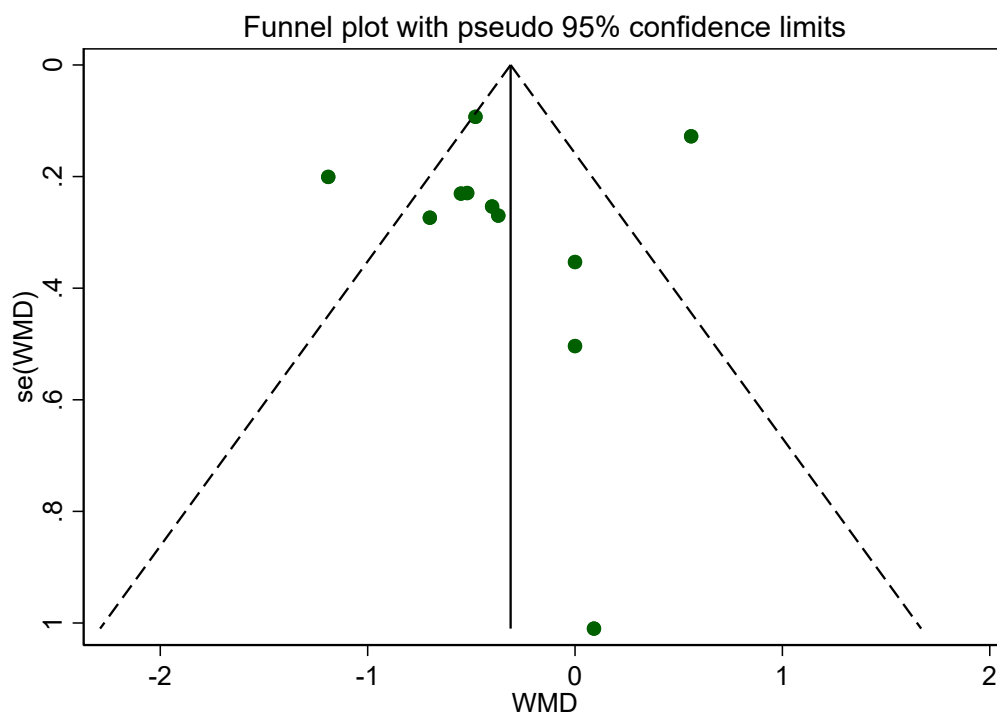

**Supplemental Figure 16** The funnel plot of HbA<sub>1c</sub>.

Supplement: d1fo03204f8.pdf [file d1fo03204f8.pdf]

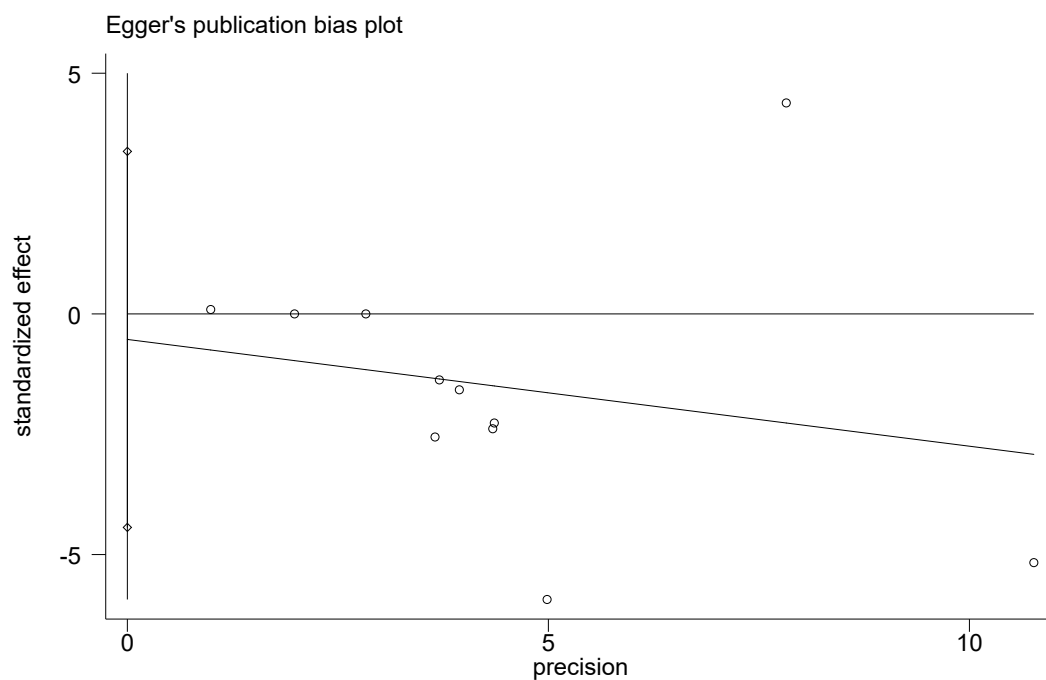

**Supplemental Figure 17** The results of Egger's test of HbA<sub>1c</sub>.

Supplement: d1fo03204f9.pdf [file d1fo03204f9.pdf]
